# Supplementary material for: Evaluating Payments for Environmental Services: Methodological Challenges
Source: PubMed Central journal article supplement (PMC4766196; doi:10.1371/journal.pone.0149374), 2016-02-24
Supplement: pone.0149374.s001.pdf [file pone.0149374.s001.pdf]

**Table 1.** Impact evaluations of conservation instruments

| Authors                               | Instrument                  | Country                                     |
|---------------------------------------|-----------------------------|---------------------------------------------|
| Ahmadia et al. (2015)                 | Protected Areas             | Indonesia                                   |
| Alix-Garcia et al. (2012)             | PES                         | Mexico                                      |
| Alix-Garcia et al. (2015)             | PES                         | Mexico                                      |
| Amin et al. (2014)                    | Protected Areas             | Brazil                                      |
| Andam et al. (2008)                   | Protected Areas             | Costa Rica                                  |
| Andam et al. (2010)                   | Protected Areas             | Costa Rica and Thailand                     |
| Arriagada (2008)                      | PES                         | Costa Rica                                  |
| Arriagada et al. (2012)               | PES                         | Costa Rica                                  |
| Bauch et al. (2014)                   | ICDP                        | Brazil                                      |
| Bruggeman et al. (2015)               | Zoning policy               | Cameroon                                    |
| Busch et al. (2015)                   | Moratorium                  | Indonesia                                   |
| Canavire-Bacarreza and Hanauer (2012) | Protected Areas             | Bolivia                                     |
| Caplow et al. (2011)                  | REDD+ Projects              | Brazil, Bolivia and Belize                  |
| Chabé-Feret and Subervie (2013)       | Agri-environmental Measures | France                                      |
| Cisneros et al. (2015)                | Blacklisting                | Brazil                                      |
| Clements and Milner-Gulland (2015)    | PES<br>protected Areas      | Cambodia                                    |
| Clements et al. (2013)                | PES                         | Cambodia                                    |
| Clements et al. (2014)                | Protected Areas             | Cambodia                                    |
| Costedoat et al. (2015)               | PES                         | Mexico                                      |
| Cuenca et al. (2015)                  | Protected Areas             | Ecuador                                     |
| Darling (2015)                        | Protected Areas             | Kenya                                       |
| Ferraro et al. (2011)                 | Protected Areas             | Costa Rica and Thailand                     |
| Ferraro et al. (2013)                 | Protected Areas             | Bolivia, Costa Rica, Indonesia and Thailand |
| Haruna et al. (2014)                  | Protected Areas             | Panama                                      |
| Honey-Roses et al. (2011)             | PES<br>Protected Areas      | Mexico                                      |

| Authors                    | Instrument                                     | Country        |
|----------------------------|------------------------------------------------|----------------|
| Jack (2009)                | PES                                            | Kenya          |
| Jack and Recalde (2015)    | PES                                            | Bolivia        |
| Joppa and Pfaff (2010)     | Protected Areas                                | Global         |
| Le Velly et al. (2015)     | PES                                            | Mexico         |
| Miranda et al. (2016)      | Protected Areas                                | Peru           |
| Miteva et al. (2015)a      | FSC Certification                              | Indonesia      |
| Miteva et al. (2015)b      | PES                                            | Indonesia      |
| Nelson and Chomitz (2009)  | Protected Areas                                | Global         |
| Pfaff et al. (2008)        | PES                                            | Costa Rica     |
| Pfaff et al. (2009)        | Protected Areas                                | Costa Rica     |
| Pfaff et al. (2014)a       | Protected Areas                                | Mexico         |
| Pfaff et al. (2014)b       | Protected Areas                                | Brazil         |
| Pfaff et al. (2015)a       | Protected Areas                                | Brazil         |
| Pfaff et al. (2015)b       | Protected Areas                                | Brazil         |
| Rasolofoson et al. (2015)  | Community forests management                   | Madagascar     |
| Robalino and al (2015)     | PES<br>Protected Areas                         | Costa Rica     |
| Robalino and Pfaff (2013)  | PES                                            | Costa Rica     |
| Robalino et al. (2008)     | PES                                            | Costa Rica     |
| Robalino et al. (2014)     | PES                                            | Costa Rica     |
| Rueda et al. (2015)        | Eco-certification                              | Colombia       |
| Sauer et al. (2012)        | Agri-environmental Measures                    | United Kingdom |
| Sharma et al. (2015)       | REDD+ Projects                                 | Nepal          |
| Sills et al. (2015)        | Mapping, monitoring and Alternative activities | Brazil         |
| Simonet et al. (2015)      | REDD+ Projects                                 | Brazil         |
| Sims (2010)                | Protected Areas                                | Thailand       |
| Sims et al. (2014)         | Protected Areas                                | Thailand       |
| Takahashi and Todo (2012)  | Community forests management                   | Ethiopia       |
| Wendland et al. (2015)     | Protected Areas                                | Russia         |
| Yanez-Pagans et al. (2013) | PES                                            | Mexico         |
